# Supplementary material for: Nanoarchitectonics tuning for Fe/N-doped C60-derived carbon electrocatalysts with enhanced ORR activity by oxygen plasma treatment on C60
Source: Royal Society of Chemistry journal article supplement (doi:10.1039/d3ta04454h), 2023-01-01
Supplement: d3ta04454h1.pdf [file d3ta04454h1.pdf]

*Supporting information*

**Nanoarchitectonics Tuning for Fe/N Doped C<sub>60</sub>-Derived Carbon  
Electrocatalysts with Enhanced ORR Activity by Oxygen  
Plasma Treatment on C<sub>60</sub>**

Li Ju,<sup>a#</sup> Gazi Hao,<sup>b#</sup> Fancang Meng,<sup>a</sup> Wei Jiang,<sup>b\*</sup> Qingmin Ji<sup>a\*</sup>

<sup>a</sup> *Herbert Gleiter Institute for Nanoscience, School of Materials Science and Engineering, Nanjing University of Science & Technology, 200 Xiaolingwei, Nanjing, 210094, China*

<sup>b</sup> *National Special Superfine Powder Engineering Technology Research Center, Nanjing University of Science and Technology, 200 Xiaolingwei, Nanjing, 210094, China*

<sup>#</sup> These authors contributed this work equally

Corresponding author: *superfine\_jw@126.com; jiqingmin@njust.edu.cn*

## Supplementary Data

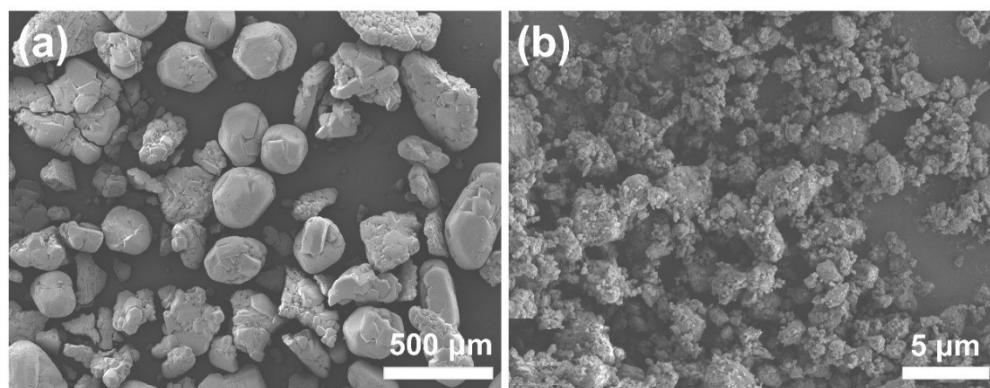

**Fig. S1.** The SEM images of (a) pristine C<sub>60</sub> before grinding, (b) pristine C<sub>60</sub> after grinding.

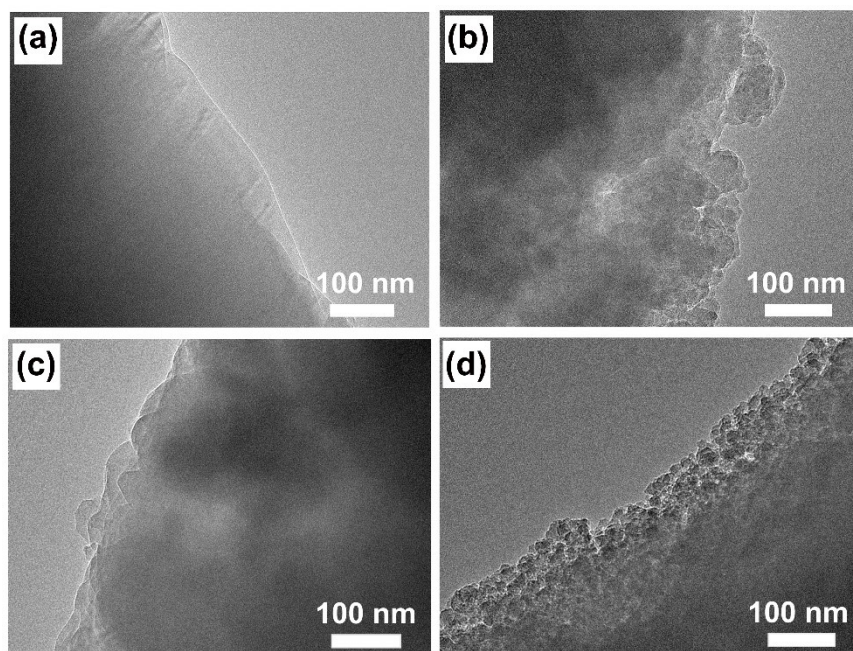

**Fig. S2.** The TEM images of (a) C<sub>60</sub>, (b) C<sub>60</sub>O, (c) Fe-C<sub>60</sub>, and (d) Fe-C<sub>60</sub>O.

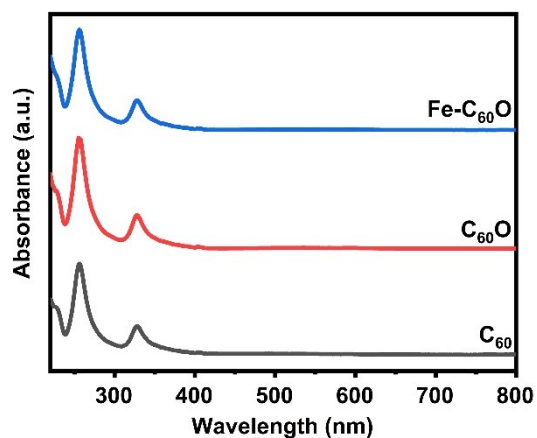

**Fig. S3.** The UV-Vis Spectra of  $C_{60}$ ,  $C_{60}O$  and  $Fe-C_{60}O$  from 220 to 800 nm in *n*-hexane.

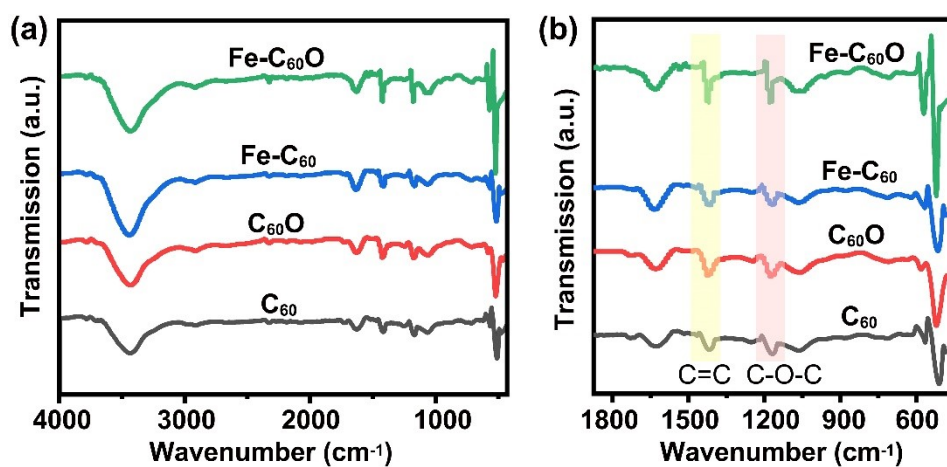

**Fig. S4.** (a) The FTIR spectra of  $C_{60}$ ,  $C_{60}O$ ,  $Fe-C_{60}$  and  $Fe-C_{60}O$  in the range of 400–4000  $cm^{-1}$ . (b) The enlarge spectra in the range of 450–2000  $cm^{-1}$ .

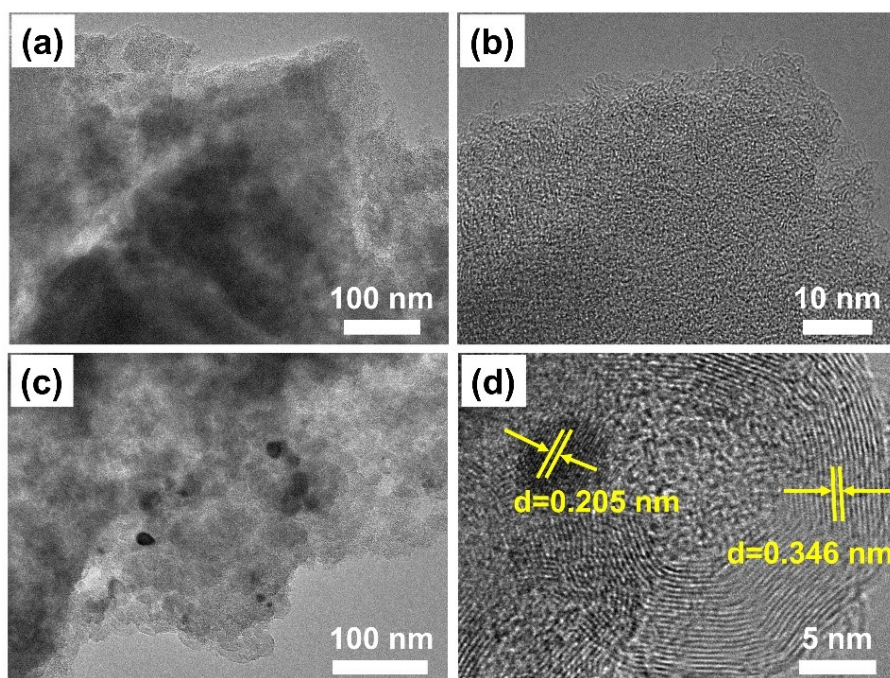

**Fig. S5.** The TEM images of (a) Fe/C<sub>60</sub>-900 and (c) Fe/C<sub>60</sub>O-900. The HR-TEM images of (b) Fe/C<sub>60</sub>-900 and (d) Fe/C<sub>60</sub>O-900.

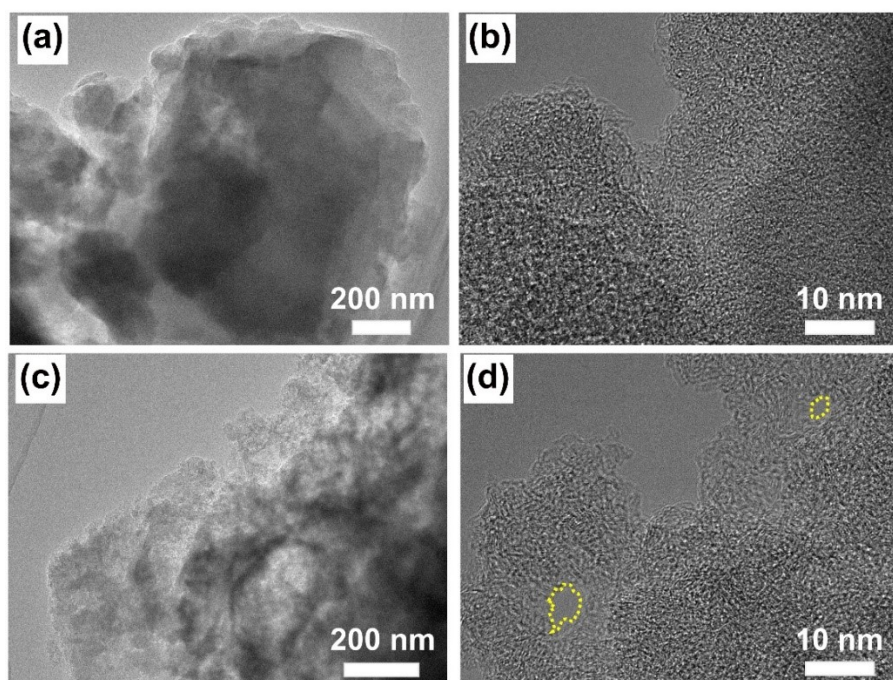

**Fig. S6.** The TEM images of (a) C<sub>60</sub>O-900 and (c) N/C<sub>60</sub>O-900. The HR-TEM images of (b) C<sub>60</sub>O-900 and (d) N/C<sub>60</sub>O-900.

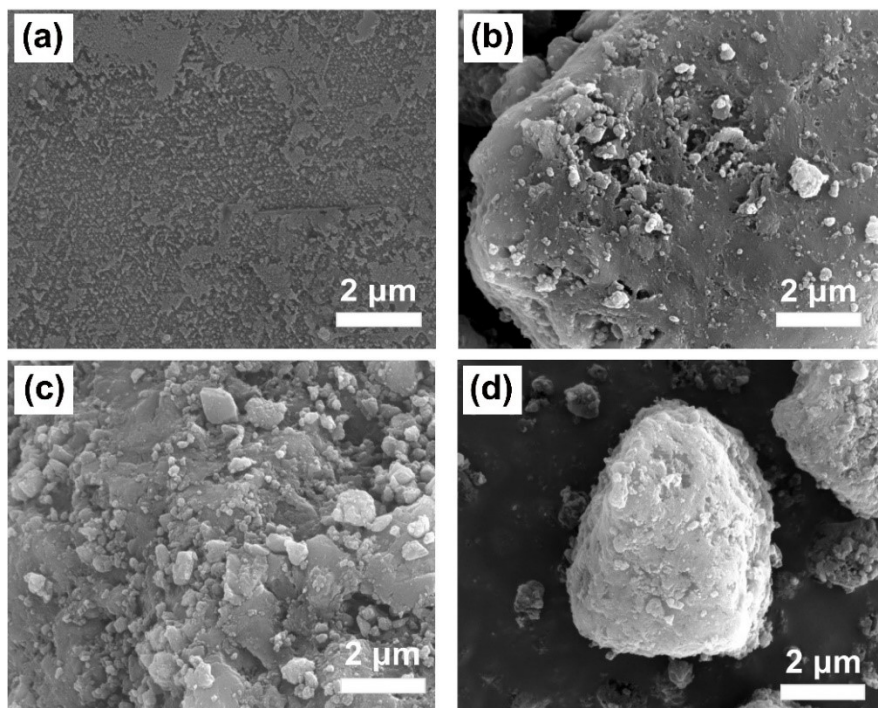

**Fig. S7.** The SEM images of (a) Fe/C<sub>60</sub>-900, (b) C<sub>60</sub>O-900, (c) Fe/C<sub>60</sub>O-900, and (d) N/C<sub>60</sub>O-900.

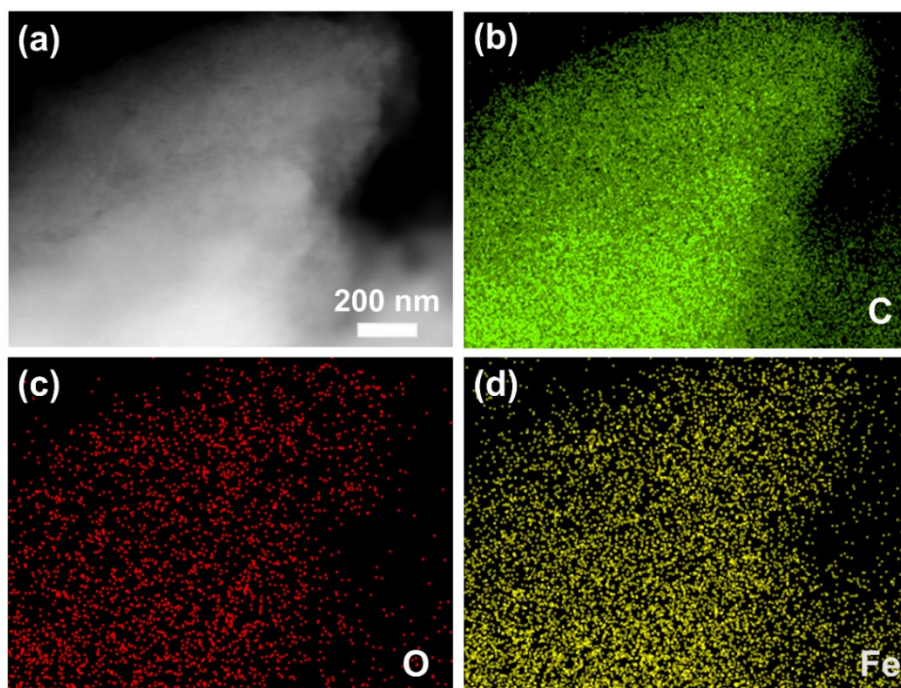

**Fig. S8.** (a) The HAADF-STEM image of Fe-C<sub>60</sub>O and the corresponding elemental mappings of (b) C, (c) O and (d) Fe.

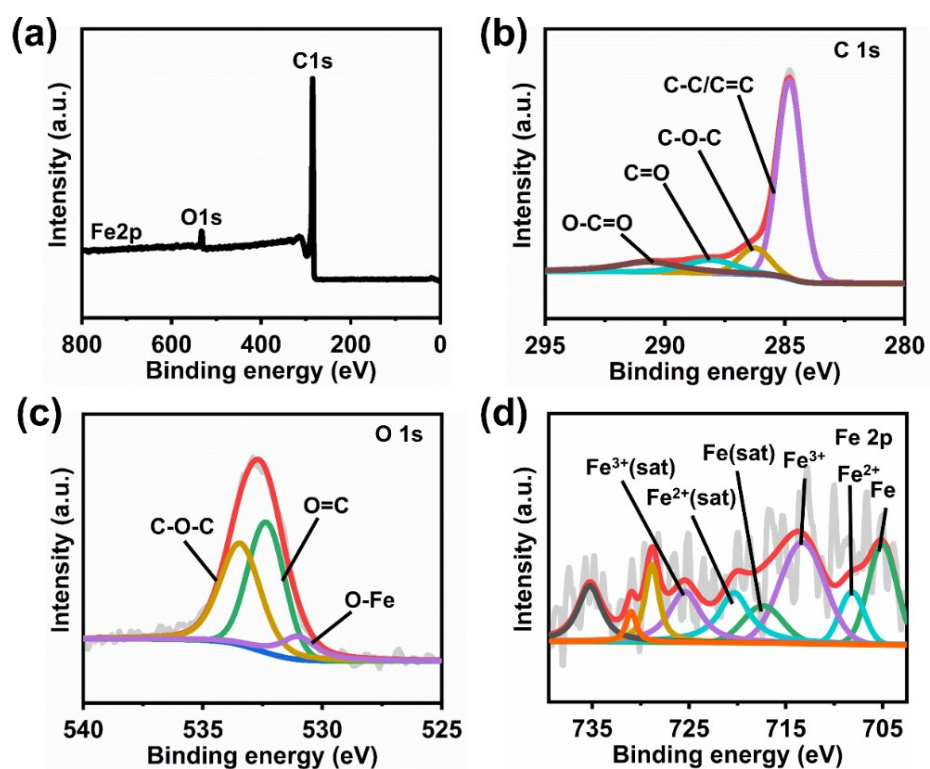

**Fig. S9.** (a) The XPS survey spectrum of Fe/C<sub>60</sub>O-900. The (b) C 1s, (c) O 1s, (d) Fe 2p XPS spectra of Fe/C<sub>60</sub>O-900.



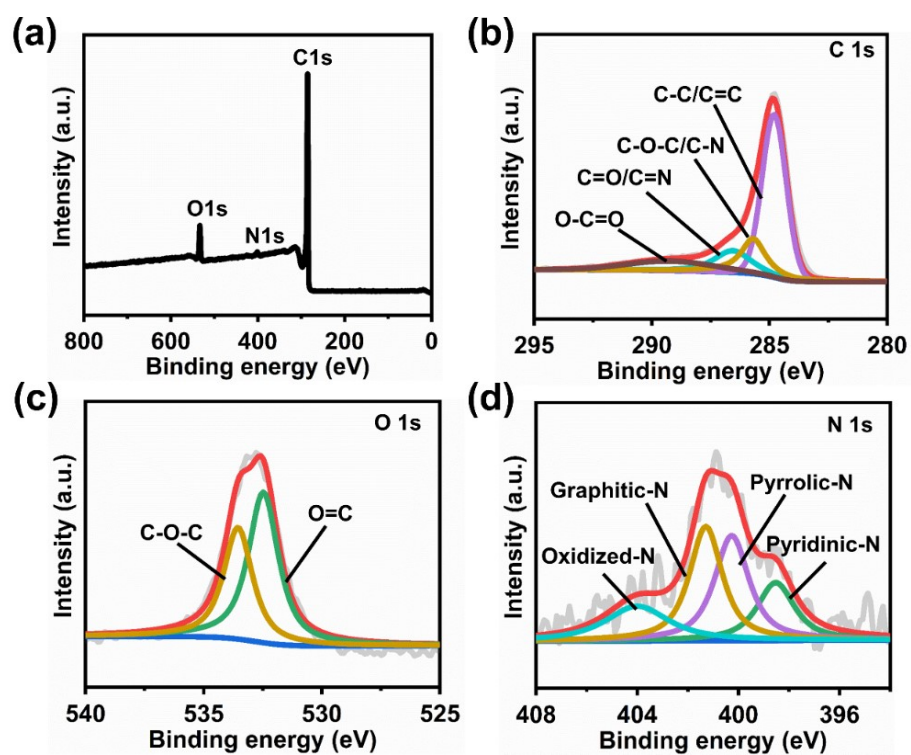

**Fig. S10.** (a) The XPS survey spectrum of N/C<sub>60</sub>O-900. The (b) C 1s, (c) O 1s, (d) N 1s XPS spectra of N/C<sub>60</sub>O-900.

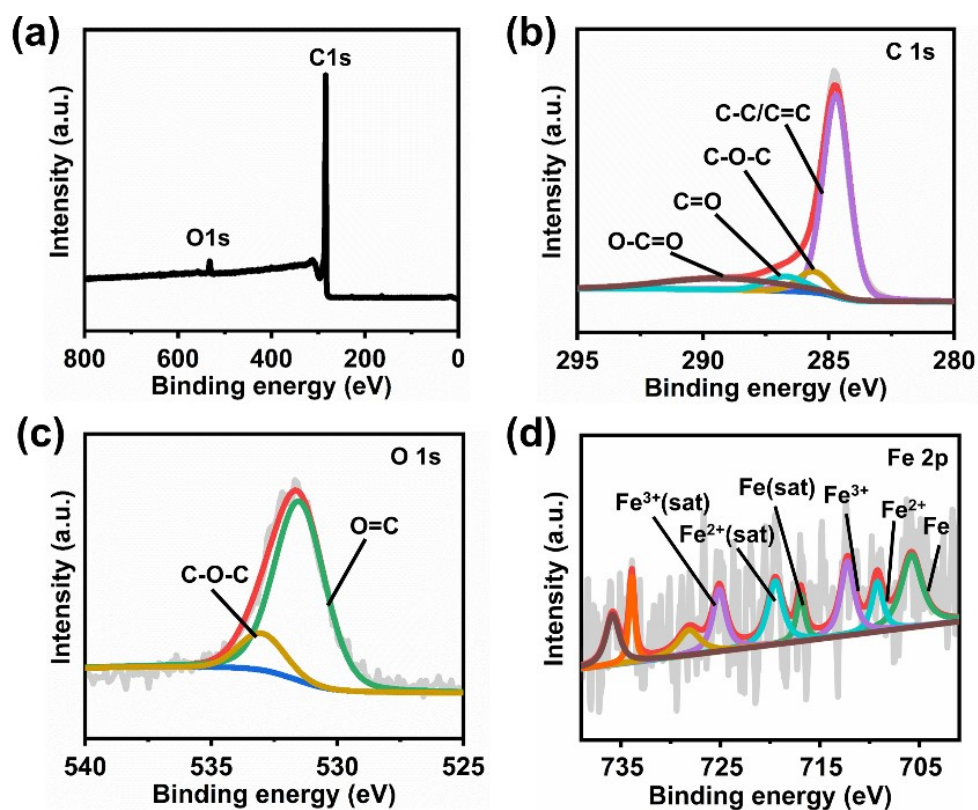

**Fig. S11.** (a) The XPS survey spectrum of Fe/C<sub>60</sub>-900. The (b) C 1s, (c) O 1s, (d) Fe 2p XPS spectra of Fe/C<sub>60</sub>-900.

**Table S1.** The calculated proportion of various Fe states in Fe containing C<sub>60</sub>-derived carbons based on the Fe 2p XPS spectra.

| Sample name               | Fe    | Fe <sup>2+</sup> | Fe <sup>3+</sup> | Fe-N  |
|---------------------------|-------|------------------|------------------|-------|
| Fe/C <sub>60</sub> -900   | 36.1% | 29.2%            | 34.7%            | -     |
| Fe/C <sub>60</sub> O-900  | 29.3% | 24.7%            | 46.0%            | -     |
| FeN/C <sub>60</sub> O-900 | 25.6% | 26.4%            | 29.0%            | 19.0% |

**Table S2.** The comparison of N, Fe contents in different reported C<sub>60</sub>-derived carbon electrocatalysts

| <b>Sample name</b>        | <b>XPS, N %</b> | <b>XPS, Fe %</b> | <b>ICP, Fe %</b> | <b>Ref.</b> |
|---------------------------|-----------------|------------------|------------------|-------------|
| FeN/C <sub>60</sub> O-900 | 2.62            | 0.16             | 4.94             | This work   |
| FeN@FCS-900               | 1.91            | 0.43             | 6.07             | [1]         |
| FMN700                    | 1.6             | 3.6              | -                | [2]         |
| MN7-10/3                  | 1.64            | 0.62             | -                | [3]         |
| Fe-MFC <sub>60</sub> -150 | -               | 1.4              | -                | [4]         |
| NP <sup>3</sup> @CHS      | 3.44            | -                | -                | [5]         |
| N,S-PCNFs                 | 4.03            | -                | -                | [6]         |
| N,S-PHCNSs-75             | 2.88            | -                | -                | [7]         |
| C <sub>60</sub> @Co-N-PCM | 2.1             | -                | -                | [8]         |

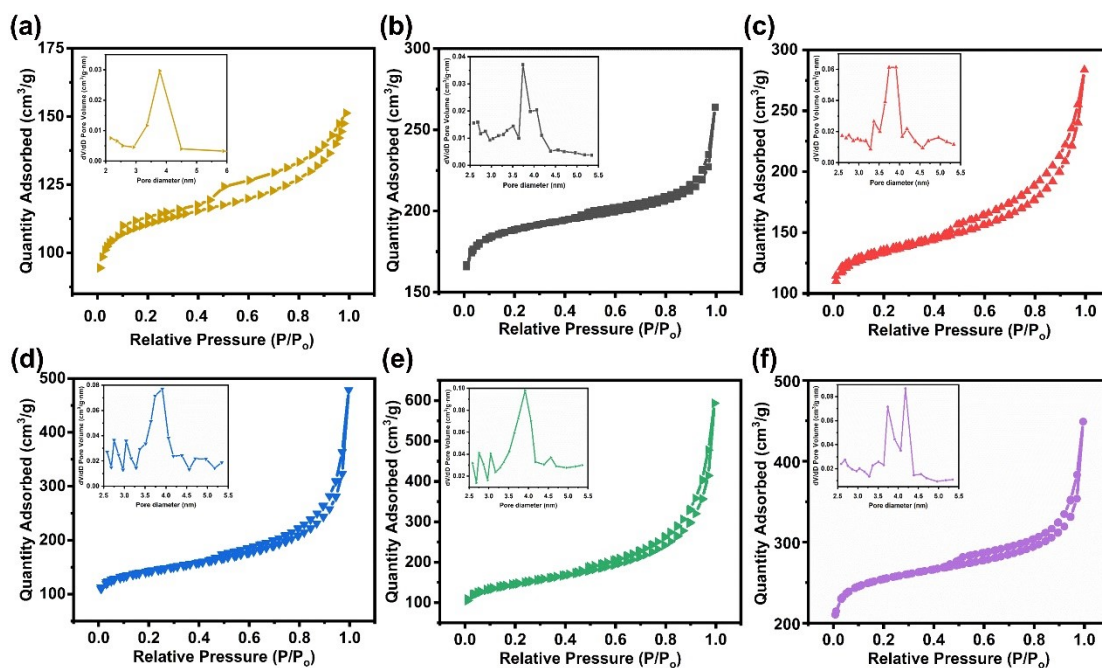

**Fig. S12.** The  $N_2$  sorption isotherms and pore size distribution curves (inset) of (a)  $C_{60}$ -900, (b)  $C_{60}O$ -900, (c)  $Fe/C_{60}$ -900, (d)  $Fe/C_{60}O$ -900, (e)  $N/C_{60}O$ -900 and (f)  $FeN/C_{60}O$ -900.

**Table S3.** The porous characteristic properties of  $C_{60}$ -900,  $C_{60}O$ -900,  $Fe/C_{60}$ -900,  $Fe/C_{60}O$ -900,  $N/C_{60}O$ -900 and  $FeN/C_{60}O$ -900 based on nitrogen sorption measurements

| Sample name        | BET surface area<br>( $m^2 g^{-1}$ ) | Average pore size<br>(nm) | Pore volume<br>( $cm^3 g^{-1}$ ) |
|--------------------|--------------------------------------|---------------------------|----------------------------------|
| $C_{60}$ -900      | 435                                  | 6.17                      | 0.080                            |
| $C_{60}O$ -900     | 596                                  | 4.06                      | 0.121                            |
| $Fe/C_{60}$ -900   | 431                                  | 5.88                      | 0.260                            |
| $Fe/C_{60}O$ -900  | 463                                  | 6.56                      | 0.453                            |
| $N/C_{60}O$ -900   | 484                                  | 9.56                      | 0.844                            |
| $FeN/C_{60}O$ -900 | 810                                  | 4.87                      | 0.297                            |

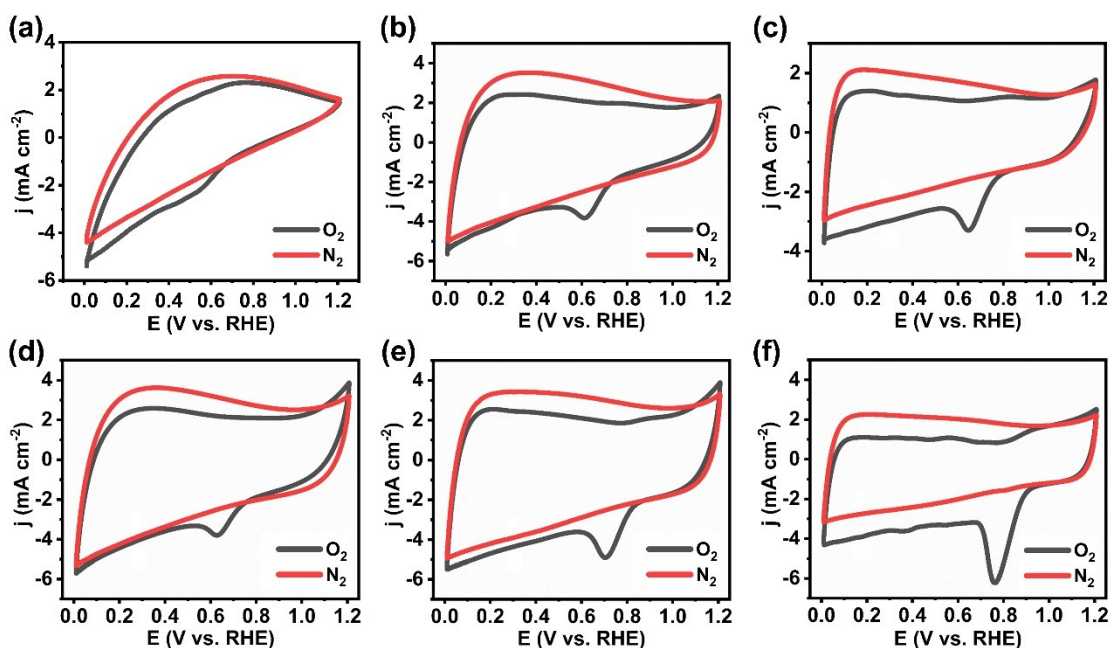

**Fig. S13.** The CV curves of (a)  $C_{60}$ -900, (b)  $Fe/C_{60}$ -900, (c)  $C_{60}O$ -900, (d)  $Fe/C_{60}O$ -900, (e)  $N/C_{60}O$ -900 and (f)  $FeN/C_{60}O$ -900 in  $N_2$  and  $O_2$ -saturated  $0.1 \text{ mol}\cdot\text{L}^{-1}$  KOH.

**Table S4.** The comparison of ORR activities of  $C_{60}$ -900,  $C_{60}O$ -900,  $Fe/C_{60}$ -900,  $Fe/C_{60}O$ -900,  $N/C_{60}O$ -900,  $FeN/C_{60}O$ -900 and Pt/C

| Sample name        | $E_0$ (V) | $E_{1/2}$ (V) | $j_L$ ( $\text{mA}\cdot\text{cm}^{-2}$ ) |
|--------------------|-----------|---------------|------------------------------------------|
| $C_{60}$ -900      | 0.75      | 0.56          | 2.05                                     |
| $Fe/C_{60}$ -900   | 0.80      | 0.64          | 3.27                                     |
| $C_{60}O$ -900     | 0.81      | 0.68          | 3.39                                     |
| $Fe/C_{60}O$ -900  | 0.83      | 0.70          | 3.69                                     |
| $N/C_{60}O$ -900   | 0.89      | 0.78          | 4.23                                     |
| $FeN/C_{60}O$ -900 | 0.98      | 0.85          | 5.23                                     |
| Pt/C               | 0.98      | 0.83          | 5.13                                     |

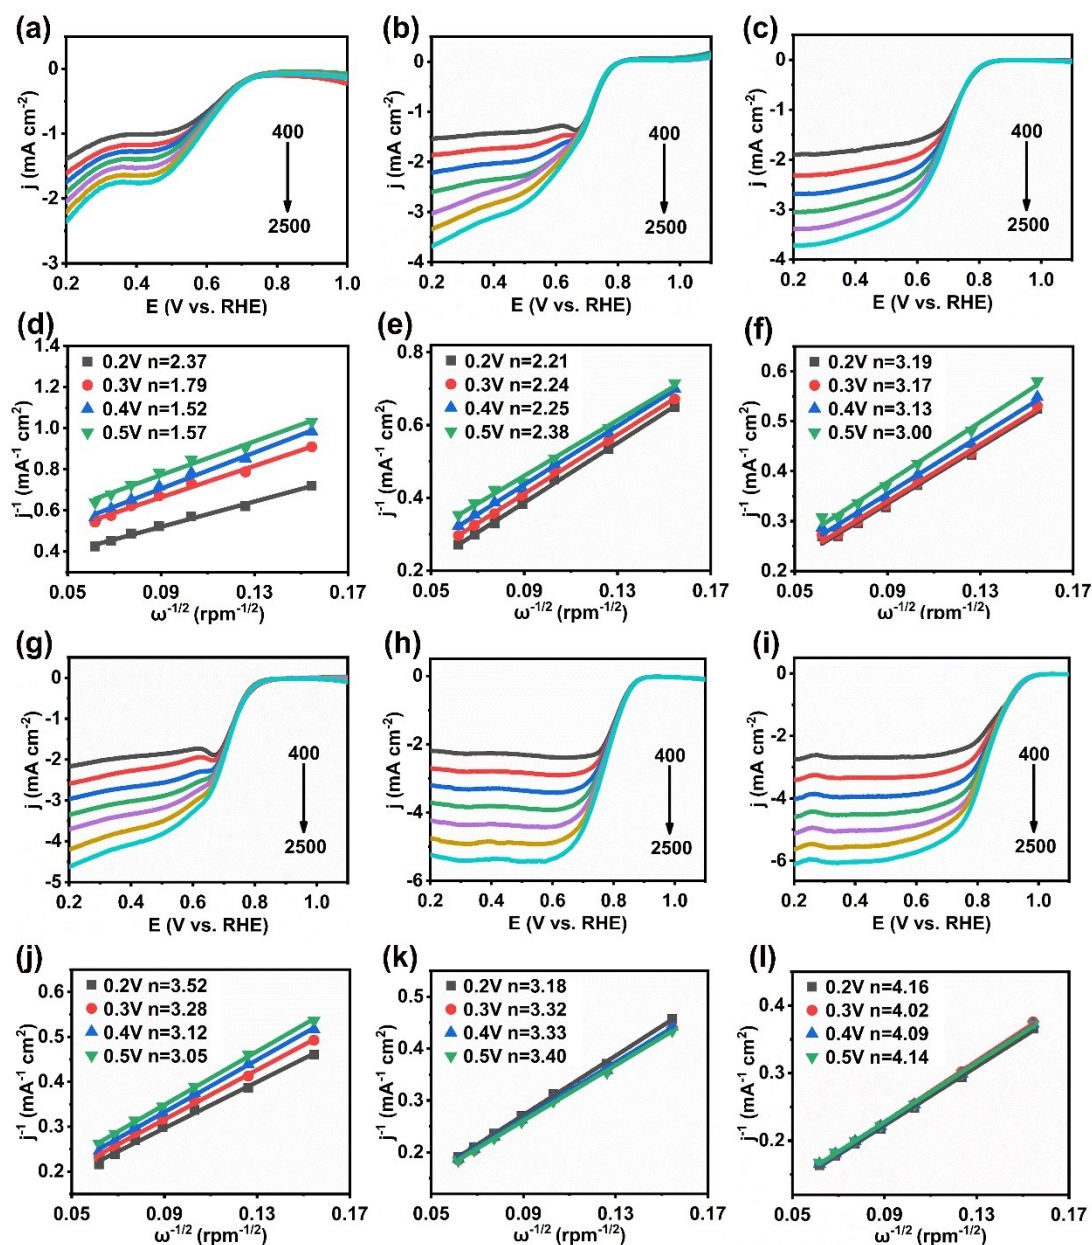

**Fig. S14.** The LSV curves of (a)  $C_{60}$ -900, (b)  $Fe/C_{60}$ -900, (c)  $C_{60}O$ -900, (g)  $Fe/C_{60}O$ -900, (h)  $N/C_{60}O$ -900 and (i)  $Pt/C$  at a series of rotation speeds from 400 rpm to 2500 rpm. The K-L plots of (d)  $C_{60}$ -900, (e)  $Fe/C_{60}$ -900 (f)  $C_{60}O$ -900, (j)  $Fe/C_{60}O$ -900 a), (k)  $N/C_{60}O$ -900 and (l)  $Pt/C$ .

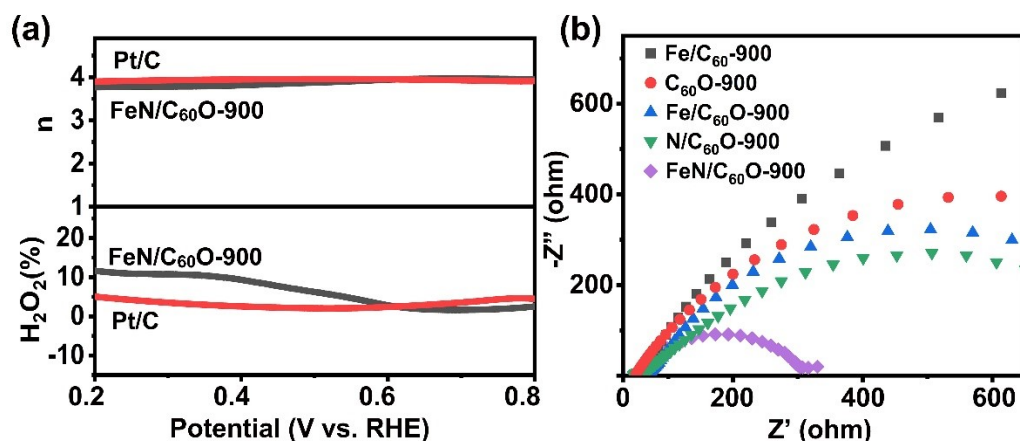

**Fig. S15.** (a) The electron transfer number ( $n$ ) and H<sub>2</sub>O<sub>2</sub>% yield of FeN/C<sub>60</sub>O-900 and Pt/C. (b) The Nyquist plots of FeN/C<sub>60</sub>O-900, N/C<sub>60</sub>O-900, Fe/C<sub>60</sub>O-900, C<sub>60</sub>O-900, and Fe/C<sub>60</sub>-900.

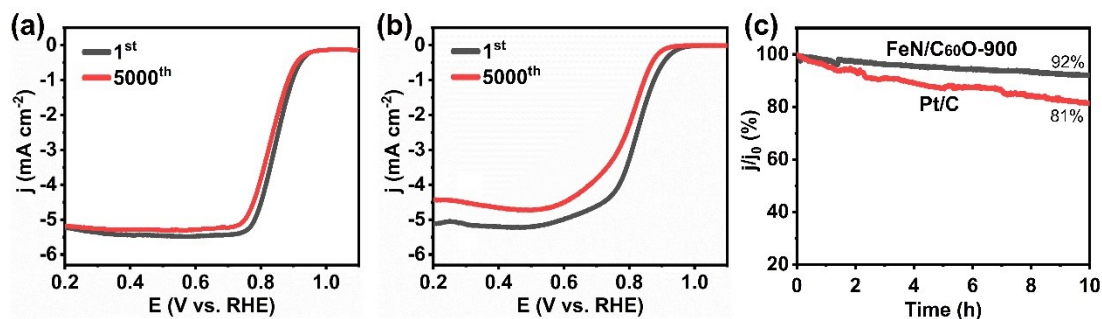

**Fig. S16.** The LSV curves of (a) FeN/C<sub>60</sub>O-900 and (b) Pt/C in O<sub>2</sub>-saturated 0.1 M KOH solution at 1600 rpm; before and after 5000 potential cycles. (c) The  $i-t$  response curves of FeN/C<sub>60</sub>O-900 and Pt/C.

**Table S5.** The comparison of the ORR performance of the reported metal-doped C<sub>60</sub>-derived carbons in alkaline medium.

| <b>Sample name</b>         | <b><math>E_0</math> (V)</b> | <b><math>E_{1/2}</math> (V)</b> | <b><math>j_L</math> (mA·cm<sup>-2</sup>)</b> | <b><i>Ref.</i></b> |
|----------------------------|-----------------------------|---------------------------------|----------------------------------------------|--------------------|
| FeN/C <sub>60</sub> O-900  | 0.98                        | 0.85                            | 5.23                                         | This work          |
| FeN@FCS-900                | 0.93                        | 0.78                            | 4.2                                          | [1]                |
| FMN700                     | 0.93                        | 0.81                            | 4.7                                          | [2]                |
| Fe-MFC <sub>60</sub> -150  | 0.85                        | 0.78                            | 3                                            | [4]                |
| C <sub>60</sub> @Co-N-PCM  | 0.98                        | 0.85                            | 5.5                                          | [8]                |
| C <sub>60</sub> /FeTPP-700 | 0.98                        | 0.88                            | 5.4                                          | [9]                |



## References (in supporting information)

- [1] B. Jiang, S. Wang, F. Meng, L. Ju, W. Jiang, Q. Ji and H. D. Quan, *CrystEngComm*, 2022, **24**, 5783-5791.
- [2] Z. Peng, Q. Jiang, P. Peng and F.-F. Li, *Eng. Sci.*, 2021, **14**, 27-38.
- [3] A. Yu, Z. Peng, Y. Li, L. Zhu, P. Peng and F.-F. Li, *ACS Appl. Mater. Interfaces*, 2022, **14**, 42337–42346
- [4] M. R. Benzigar, S. Joseph, G. Saianand, A.-I. Gopalan, S. Sarkar, S. Srinivasan, D.-H. Park, S. Kim, S. N. Talapaneni and K. Ramadass, *Microporous Mesoporous Mater.*, 2019, **285**, 21-31.
- [5] F. Meng, S. Wang, B. Jiang, L. Ju, H. Xie, W. Jiang and Q. Ji, *Nanoscale*, 2022, **14**, 10389-10398.
- [6] Z. He, P. Wei, N. Chen, J. Han and X. Lu, *Chem.-Eur. J.*, 2021, **27**, 1423-1429.
- [7] Z. He, P. Wei, T. Xu, J. Han, X. Gao and X. Lu, *Mater. Chem. Front.*, 2021, **5**, 7873-7882.
- [8] J. Wu, S. Wang, Z. Lei, R. Guan, M. Chen, P. Du, Y. Lu, R. Cao and S. Yang, *Nano Res.*, 2021, **14**, 2596-2605.
- [9] H. Wang, L. Cao, Y. Feng, J. Chen, W. Feng, T. Luo, Y. Hu, C. Yuan, Y. Zhao, Y. Zhao, K. Kajiyoshi, Y. Liu, Z. Li and J. Huang, *Chin. Chem. Lett.*, 2023, **34**, 107601.
